# Supplementary material
Source: Springer Nature journal article supplement (https://www.springermedizin.de/resource/supplementary/12889_2013_6814_MOESM2_ESM.pdf/9499042)
Supplement: MOESM2 [file 9499042]

**Table 1: Socio-demographic characteristics of the study population**

| Characteristics                 | Age (years)  |              | 18 - 36<br>(N=133) | 37 - 60<br>(N=136) | P-value |
|---------------------------------|--------------|--------------|--------------------|--------------------|---------|
|                                 | 18 - 36      | 37 - 60      |                    |                    |         |
| <b>Age</b>                      | 30.5 (± 3.8) | 43.3 (± 5.1) |                    |                    | <0.001  |
| <b>Education</b>                |              |              |                    |                    | 0.59    |
| - ≤ 6 years                     |              |              | 20 (15.1)          | 18 (13.2)          |         |
| - Secondary                     |              |              | 95 (71.4)          | 92 (67.6)          |         |
| - Tertiary                      |              |              | 18 (13.5)          | 26 (19.2)          |         |
| <b>Marital Status</b>           |              |              |                    |                    | 0.17    |
| - Married                       |              |              | 76 (57.1)          | 89 (65.4)          |         |
| - Not married                   |              |              | 57 (42.9)          | 47 (34.6)          |         |
| <b>Age at sexual initiation</b> | 19.8 (± 4.2) | 20.0 (± 4.1) |                    |                    | 0.6     |
| <b>Age at sexual initiation</b> |              |              |                    |                    | 0.9     |
| - < 18                          |              |              | 33 (25.0)          | 28 (21.2)          |         |
| - 18 – 21                       |              |              | 63 (47.7)          | 66 (50.0)          |         |
| - 22 - 25                       |              |              | 21 (15.9)          | 23 (17.4)          |         |
| - > 25                          |              |              | 15 (11.4)          | 15 (11.4)          |         |
| <b>Total sex partners</b>       | 3.6 (± 3.6)  | 3.6 (± 5.4)  |                    |                    | 0.15    |
| <b>Total sex partners</b>       |              |              |                    |                    | 0.2     |
| - 1                             |              |              | 31 (23.3)          | 43 (31.6)          |         |
| - 2 – 3                         |              |              | 58 (43.6)          | 57 (41.9)          |         |
| - 4 – 5                         |              |              | 28 (21.1)          | 17 (12.5)          |         |
| - ≥ 6                           |              |              | 16 (12.0)          | 19 (14.0)          |         |
| <b>HIV Status</b>               |              |              |                    |                    | 0.08    |
| - Positive                      |              |              | 79 (62.7)          | 69 (52.0)          |         |
| - Negative                      |              |              | 47 (37.3)          | 64 (48.0)          |         |
| <b>Contraceptive use</b>        |              |              |                    |                    | 0.71    |
| - Yes                           |              |              | 48 (36.0)          | 53 (39.0)          |         |
| - No                            |              |              | 85 (64.0)          | 83 (61.0)          |         |
| <b>Condom use*</b>              |              |              |                    |                    | 0.62    |
| - Yes                           |              |              | 2 (1.5)            | 1 (0.7)            |         |
| - No                            |              |              | 131 (98.5)         | 139 (99.3)         |         |
| <b>Douching</b>                 |              |              |                    |                    | 0.17    |
| - Yes                           |              |              | 90 (67.7)          | 80 (58.8)          |         |
| - No                            |              |              | 43 (32.3)          | 56 (41.2)          |         |
| <b>Menstrual sanitation</b>     |              |              |                    |                    | 0.08    |
| - Sanitary pads                 |              |              | 104 (78.2)         | 98 (72.1)          |         |
| - Tissue paper                  |              |              | 11 (8.3)           | 23 (16.9)          |         |
| - Cloth                         |              |              | 17 (12.7)          | 12 (8.8)           |         |
| - Tampons                       |              |              | 1(0.8)             | 3(2.2)             |         |

|                               |               |              |           |        |
|-------------------------------|---------------|--------------|-----------|--------|
| <b>BMI (Kg/m<sup>2</sup>)</b> | 26.1 (± 12.1) | 29.4 (± 6.5) |           | 0.006  |
| <b>BMI (Kg/m<sup>2</sup>)</b> |               |              |           | <0.001 |
| - 18.5 – 24.9                 |               | 66 (54.6)    | 27 (20.8) |        |
| - 25.0 – 29.9                 |               | 28 (23.1)    | 45 (34.6) |        |
| - 30+                         |               | 27 (22.3)    | 58 (44.6) |        |

---

#Age in years

\*Consistent condom use in the past 2 years
